# Supplementary material for: Therapeutic efficacy of probiotic Alkalihalobacillus clausii 088AE in antibiotic-associated diarrhea: A randomized controlled trial
Source: PubMed Central journal article supplement — Heliyon. 2021 Sep 15;7(9):e07993. doi: 10.1016/j.heliyon.2021.e07993 (PMC8453216; doi:10.1016/j.heliyon.2021.e07993), 2021-09-15
Supplement: mmc1.pdf [file mmc1.pdf]

**Therapeutic efficacy of probiotic *Alkalihalobacillus clausii* 088AE in antibiotic-associated diarrhea: a randomized controlled trial**

Chiranjit Maity\* and Anil Kumar Gupta

**\* Corresponding author**

Dr. Chiranjit Maity

Email: [chiranjit@advancedenzymes.com](mailto:chiranjit@advancedenzymes.com)

Probiotics Laboratory, Advanced Enzyme Technologies Ltd.,

5<sup>th</sup> Floor, A-Wing, Sun Magnetica, LIC Service Road

Louiswadi, Thane (W) - 400 604

Maharashtra, India

## **Methods**

### **Method of Analysis**

The investigational product (IP) containing active ingredient, *Alkalihalobacillus clausii* 088AE [2000 million spores per gram per sachet ( $2000 \times 10^6$  spore/g/sachet) which is equivalent to 2 billion spores per gram per sachet ( $2 \times 10^9$  spore/g/sachet)], was supplied by Advanced Enzyme Technologies Ltd., Thane, India. The viable spore count of *B. clausii* 088AE was determined by pour plate technique. Briefly, one sachet of IP powder (1.00 g) was suspended in tween peptone water (% , compositions: protease peptone, 1.0 %; sodium chloride, 0.5 %; disodium phosphate, 0.35 %; monosodium phosphate, 0.15; tween 80, 0.2 %) and kept under sonication ( $33 \pm 3$  KHz) at 10°C. Sonicated samples were then serially diluted. The diluted samples were given heat shock in a water bath at 70°C for 15 min, followed immediate cooling to below 45°C. 1.0 ml of thus obtained treated spore suspension was dispensed in petriplate and presterilized molten brain-heart infusion (BHI) agar (SM211, HiMedia, Mumbai, India) was added to the plates. The plates were allowed to solidify and invertedly incubated at 37 °C for 48–72 h. The activity was expressed in colony forming units of viable spores per gram (cfu/g) of powder by taking the average mean of results. The placebo contained only the excipient, maltodextrin. Both the investigational and placebo product had passed through other required specifications like physical appearance, microscopic appearance, strength, heavy metals and microbial limit [other aerobic microbial count, yeast & mold count, *Escherichia coli*, *Salmonella* spp., *Listeria monocytogenes*, *Staphylococcus aureus* and *Pseudomonas aeruginosa*]. Microbial limit tests were analysed following standard Indian Pharmacopeia guidelines or other international standard guidelines. All the analyses were performed in triplicate, for three times.

## Details of Exclusion and Withdrawal Criteria

### *Exclusion criteria*

The subjects who had following criteria were excluded for the study

- On antibiotics or laxatives within the preceding 6 weeks.
- Presence of inflammatory bowel disease
- Presence of acute GI tract infection
- Presence of fever, abdominal mass, signs of bowel obstruction
- History of colon cancer or diverticulitis
- Infection by human immunodeficiency virus (HIV), hepatitis B virus and hepatitis C virus
- Patients with celiac disease defined by biopsy of the duodenal mucosa.
- History of scleroderma and gastroparesis
- Hypothyroidism

### *Withdrawal criteria*

The patient can be withdrawn from the study by the investigator for any of the following:

- Occurrence of an adverse event, associated with the administration of the IP and requiring its cancellation.
- Emergence of any diseases or conditions during the study that worsen the prognosis of the patient, as well as make it impossible for the patient to continue his/her participation in the clinical study.
- The need for a forbidden concomitant therapy.
- Pregnancy of the patient.
- Violation of the study protocol, like
  - Improper inclusion of the patient who did not meet the inclusion criteria and/or met the relevant exclusion criteria; other violations of the protocol, which, according to the investigators, are significant.
- Withdrawal of the informed consent by the patient

**Table S1** Assessment of vital signs of adolescent and adult subjects from both Test-AA and Placebo-AA arm suffered with antibiotic-associated diarrhea (AAD) and undergone treatment with *Alkalihalobacillus clausii* 088AE at different visits (visit 01 – visit 05). Values are expressed as mean  $\pm$  SD and group mean differences (Test-AA to Placebo-AA) are calculated by Kruskal-Wallis one-way ANOVA.

| <b>Study arms</b>                                                     | <b>Parameters</b>                | <b>Visit 01<br/>(Day 1)</b> | <b>Visit 02<br/>(Day 2)</b> | <b>Visit 03<br/>(Day 3)</b> | <b>Visit 04<br/>(Day 5)</b> | <b>Visit 05<br/>(Day 8)</b> |
|-----------------------------------------------------------------------|----------------------------------|-----------------------------|-----------------------------|-----------------------------|-----------------------------|-----------------------------|
| <b>Test-AA</b>                                                        | Pulse (per minute)               | 68.90 $\pm$ 7.77            | 66.06 $\pm$ 9.31            | 68.06 $\pm$ 6.46            | 71.23 $\pm$ 7.30            | 69.33 $\pm$ 7.05            |
|                                                                       | Respiratory rate (per minute)    | 18.23 $\pm$ 0.93            | 17.67 $\pm$ 0.99            | 18.20 $\pm$ 0.88            | 18.26 $\pm$ 1.01            | 18.00 $\pm$ 0.94            |
|                                                                       | Systolic blood pressure (mm/Hg)  | 121.06 $\pm$ 8.75           | 121.46 $\pm$ 9.17           | 120.53 $\pm$ 6.70           | 121.67 $\pm$ 7.31           | 122.60 $\pm$ 8.29           |
|                                                                       | Diastolic blood pressure (mm/Hg) | 78.20 $\pm$ 6.50            | 78.26 $\pm$ 5.55            | 77.13 $\pm$ 5.51            | 79.93 $\pm$ 5.88            | 79.13 $\pm$ 5.67            |
|                                                                       | Temperature ( $^{\circ}$ F)      | 98.98 $\pm$ 0.89            | 98.46 $\pm$ 0.12            | 98.47 $\pm$ 0.10            | 98.48 $\pm$ 0.11            | 98.48 $\pm$ 0.07            |
| <b>Placebo-AA</b>                                                     | Pulse (per minute)               | 68.16 $\pm$ 7.78            | 65.46 $\pm$ 8.92            | 69.13 $\pm$ 5.91            | 70.96 $\pm$ 7.21            | 70.13 $\pm$ 5.77            |
|                                                                       | Respiratory rate (per minute)    | 17.90 $\pm$ 1.37            | 17.83 $\pm$ 1.02            | 18.10 $\pm$ 1.03            | 18.10 $\pm$ 1.02            | 18.13 $\pm$ 1.16            |
|                                                                       | Systolic blood pressure (mm/Hg)  | 120.66 $\pm$ 8.22           | 122.60 $\pm$ 9.17           | 122.46 $\pm$ 6.31           | 122.26 $\pm$ 8.20           | 122.20 $\pm$ 8.68           |
|                                                                       | Diastolic blood pressure (mm/Hg) | 77.73 $\pm$ 5.93            | 78.60 $\pm$ 6.32            | 79.20 $\pm$ 6.07            | 80.00 $\pm$ 7.16            | 79.26 $\pm$ 6.63            |
|                                                                       | Temperature ( $^{\circ}$ F)      | 98.75 $\pm$ 0.78            | 98.41 $\pm$ 0.28            | 98.39 $\pm$ 0.27            | 98.44 $\pm$ 0.29            | 98.41 $\pm$ 0.28            |
| <b>Group mean difference (Test-AA to Placebo-AA) by one-way ANOVA</b> |                                  |                             |                             |                             |                             |                             |
| <b>P value (p&lt;0.05)</b>                                            |                                  |                             |                             |                             |                             |                             |
| Pulse (per minute)                                                    |                                  | 0.9168                      |                             |                             |                             |                             |
| Respiratory rate (per minute)                                         |                                  | 0.3472                      |                             |                             |                             |                             |
| Systolic blood pressure (mm/Hg)                                       |                                  | 0.2962                      |                             |                             |                             |                             |
| Diastolic blood pressure (mm/Hg)                                      |                                  | 0.3472                      |                             |                             |                             |                             |
| Temperature ( $^{\circ}$ F)                                           |                                  | 0.0758                      |                             |                             |                             |                             |

**Table S2** Assessment of vital signs of pediatric subjects from both Test-PS and Placebo-PS arm suffered with antibiotic-associated diarrhea (AAD) and undergone treatment with *Alkalihalobacillus clausii* 088AE at different visits (visit 01 – visit 05). Values are expressed as mean  $\pm$  SD and group mean differences (Test-PS to Placebo-PS) are calculated by Kruskal-Wallis one-way ANOVA.

| <b>Study arms</b>                                                     | <b>Parameters</b>                | <b>Visit 01<br/>(Day 1)</b> | <b>Visit 02<br/>(Day 2)</b> | <b>Visit 03<br/>(Day 3)</b> | <b>Visit 04<br/>(Day 5)</b> | <b>Visit 05<br/>(Day 8)</b> |
|-----------------------------------------------------------------------|----------------------------------|-----------------------------|-----------------------------|-----------------------------|-----------------------------|-----------------------------|
| <b>Test-PS<br/>(n=30)</b>                                             | Pulse<br>(per minute)            | 85.70 $\pm$ 6.44            | 85.07 $\pm$ 6.64            | 85.53 $\pm$ 6.66            | 86.63 $\pm$ 5.37            | 86.70 $\pm$ 6.09            |
|                                                                       | Respiratory rate (per<br>minute) | 20.63 $\pm$ 3.06            | 20.73 $\pm$ 3.05            | 20.90 $\pm$ 2.68            | 20.50 $\pm$ 2.82            | 21.43 $\pm$ 2.91            |
|                                                                       | Temperature ( $^{\circ}$ F)      | 97.02 $\pm$ 0.87            | 97.12 $\pm$ 0.71            | 97.26 $\pm$ 0.54            | 97.12 $\pm$ 0.55            | 97.35 $\pm$ 0.75            |
| <b>Placebo-PS<br/>(n=30)</b>                                          | Pulse<br>(per minute)            | 85.97 $\pm$ 6.84            | 87.00 $\pm$ 6.15            | 86.30 $\pm$ 6.85            | 87.30 $\pm$ 6.41            | 86.36 $\pm$ 6.99            |
|                                                                       | Respiratory rate (per<br>minute) | 20.87 $\pm$ 3.45            | 20.96 $\pm$ 3.17            | 21.76 $\pm$ 2.82            | 20.90 $\pm$ 2.75            | 21.33 $\pm$ 2.77            |
|                                                                       | Temperature ( $^{\circ}$ F)      | 97.09 $\pm$ 0.69            | 97.25 $\pm$ 0.71            | 97.44 $\pm$ 0.64            | 97.21 $\pm$ 0.77            | 97.07 $\pm$ 0.76            |
| <b>Group mean difference (Test-PS to Placebo-PS) by one-way ANOVA</b> |                                  |                             |                             |                             |                             |                             |
| <b>P value (p&lt;0.05)</b>                                            |                                  |                             |                             |                             |                             |                             |
| Pulse (per minute)                                                    |                                  | 0.1745                      |                             |                             |                             |                             |
| Respiratory rate (per minute)                                         |                                  | 0.1436                      |                             |                             |                             |                             |
| Temperature ( $^{\circ}$ F)                                           |                                  | 0.9168                      |                             |                             |                             |                             |

**Table S3** Assessment of hematological and biochemical parameters of adolescent and adult subjects from both Test-AA and Placebo-AA arm suffered with antibiotic-associated diarrhea (AAD) and undergone treatment with *Alkalihalobacillus clausii* 088AE at baseline and end of treatment (EOT). Values are expressed as mean  $\pm$  SD and significance between mean difference (Test-AA to Placebo-AA) is tested at  $p < 0.05$ .

| Parameters                                                       | Visit    | Test-AA             | Placebo-AA          | P value<br>( $p < 0.05$ ) | 95% CI          | Normal range       |
|------------------------------------------------------------------|----------|---------------------|---------------------|---------------------------|-----------------|--------------------|
| Hemoglobin (g/dL)                                                | Baseline | 13.71 $\pm$ 1.56    | 13.55 $\pm$ 1.50    | 0.687                     | -0.951, 0.631   | 13-16 (Male)       |
|                                                                  | EOT      | 13.73 $\pm$ 1.43    | 13.78 $\pm$ 1.25    | 0.886                     | -0.644, 0.744   | 12-15 (Female)     |
| RBC count<br>(million/mm <sup>3</sup> )                          | Baseline | 4.51 $\pm$ 0.54     | 4.46 $\pm$ 0.57     | 0.728                     | -0.337, 0.237   | 4.60-6.00 (Male)   |
|                                                                  | EOT      | 4.59 $\pm$ 0.51     | 4.68 $\pm$ 0.46     | 0.476                     | -0.161, 0.341   | 4.00-5.40 (Female) |
| Total leukocyte count<br>( $\times 10^3$ cells/mm <sup>3</sup> ) | Baseline | 6.84 $\pm$ 1.72     | 6.78 $\pm$ 1.58     | 0.889                     | -0.914, 0.793   | 4.00-11.00         |
|                                                                  | EOT      | 6.71 $\pm$ 1.51     | 6.81 $\pm$ 1.49     | 0.797                     | -0.675, 0.875   |                    |
| Neutrophils (%)                                                  | Baseline | 55.67 $\pm$ 3.94    | 56.16 $\pm$ 5.84    | 0.704                     | -2.084, 3.064   | 40-75              |
|                                                                  | EOT      | 55.03 $\pm$ 3.32    | 56.46 $\pm$ 5.38    | 0.220                     | -0.880, 3.740   |                    |
| Lymphocytes (%)                                                  | Baseline | 34.30 $\pm$ 3.65    | 33.96 $\pm$ 5.65    | 0.783                     | -2.798, 2.118   | 20-42              |
|                                                                  | EOT      | 35.10 $\pm$ 3.13    | 33.53 $\pm$ 5.09    | 0.155                     | -3.754, 0.613   |                    |
| Eosinophils (%)                                                  | Baseline | 4.86 $\pm$ 0.86     | 4.38 $\pm$ 1.09     | 0.063                     | -0.987, 0.027   | 1-7                |
|                                                                  | EOT      | 4.23 $\pm$ 0.93     | 4.53 $\pm$ 0.77     | 0.179                     | -0.141, 0.741   |                    |
| Monocytes (%)                                                    | Baseline | 5.16 $\pm$ 2.10     | 5.56 $\pm$ 1.97     | 0.449                     | -0.652, 1.452   | 2-10               |
|                                                                  | EOT      | 5.66 $\pm$ 1.53     | 5.80 $\pm$ 1.88     | 0.753                     | -0.745, 1.025   |                    |
| Basophils (%)                                                    | Baseline | 0.00                | 0.00                | -                         | -               | 0-1                |
|                                                                  | EOT      | 0.00                | 0.00                | -                         | -               |                    |
| Hematocrit (PCV, %)                                              | Baseline | 40.01 $\pm$ 3.78    | 39.40 $\pm$ 3.81    | 0.536                     | -2.571, 1.351   | 40-50 (Male)       |
|                                                                  | EOT      | 40.04 $\pm$ 3.01    | 40.09 $\pm$ 2.63    | 0.945                     | -1.411, 1.510   | 36-46 (Female)     |
| Platelet Count<br>(lakh/mm <sup>3</sup> )                        | Baseline | 125.43 $\pm$ 134.87 | 109.69 $\pm$ 117.68 | 0.632                     | -81.155, 49.675 | 0.15-0.45          |
|                                                                  | EOT      | 129.75 $\pm$ 135.88 | 117.13 $\pm$ 121.46 | 0.706                     | -79.226, 53.986 |                    |
| ESR (mm/hr)                                                      | Baseline | 12.40 $\pm$ 5.81    | 11.70 $\pm$ 5.58    | 0.636                     | -3.644, 2.244   | 0-20 (Male)        |
|                                                                  | EOT      | 11.46 $\pm$ 5.43    | 10.80 $\pm$ 4.80    | 0.619                     | -3.308, 1.988   | 0-30 (Female)      |
| SGOT (AST) (U/L)                                                 | Baseline | 18.30 $\pm$ 5.01    | 19.60 $\pm$ 5.12    | 0.324                     | -1.318, 3.918   | 5-40               |
|                                                                  | EOT      | 19.83 $\pm$ 3.71    | 20.66 $\pm$ 3.69    | 0.388                     | -1.082, 2.742   |                    |
| SGPT (ALT) (U/L)                                                 | Baseline | 29.56 $\pm$ 12.93   | 26.97 $\pm$ 7.46    | 0.346                     | -8.045, 2.865   | 7-56               |
|                                                                  | EOT      | 25.67 $\pm$ 5.56    | 27.66 $\pm$ 7.71    | 0.256                     | -1.484, 5.464   |                    |
| Creatinine (mg/dL)                                               | Baseline | 0.82 $\pm$ 0.15     | 0.78 $\pm$ 0.12     | 0.259                     | -0.110, 0.030   | 0.5-1.4            |
|                                                                  | EOT      | 0.79 $\pm$ 0.11     | 0.80 $\pm$ 0.08     | 0.689                     | -0.039, 0.059   |                    |
| BUN (mg/dL)                                                      | Baseline | 8.46 $\pm$ 3.92     | 10.05 $\pm$ 5.85    | 0.221                     | -0.984, 4.163   | 14-36              |
|                                                                  | EOT      | 9.76 $\pm$ 2.69     | 9.09 $\pm$ 2.42     | 0.315                     | -1.992, 0.652   |                    |
| Albumin (g/dL)                                                   | Baseline | 3.82 $\pm$ 0.40     | 3.78 $\pm$ 0.39     | 0.696                     | -0.244, 0.164   | 3.4-5.4            |
|                                                                  | EOT      | 3.82 $\pm$ 0.36     | 3.86 $\pm$ 0.41     | 0.689                     | -0.159, 0.239   |                    |
| Serum sodium<br>(mEq/L)                                          | Baseline | 138.03 $\pm$ 2.75   | 137.58 $\pm$ 2.33   | 0.497                     | -1.767, 0.867   | 135-145            |
|                                                                  | EOT      | 137.60 $\pm$ 2.40   | 137.45 $\pm$ 3.09   | 0.834                     | -1.579, 1.279   |                    |
| Serum potassium<br>(mmol/L)                                      | Baseline | 3.97 $\pm$ 0.38     | 3.86 $\pm$ 0.36     | 0.254                     | -0.301, 0.081   | 3.6-5.2            |
|                                                                  | EOT      | 4.02 $\pm$ 0.38     | 3.94 $\pm$ 0.39     | 0.424                     | -0.279, 0.119   |                    |
| Total cholesterol<br>(mg/dL)                                     | Baseline | 153.26 $\pm$ 24.91  | 147.26 $\pm$ 21.48  | 0.322                     | -18.020, 6.020  | 125-200            |
|                                                                  | EOT      | 148.96 $\pm$ 19.39  | 142.36 $\pm$ 17.73  | 0.174                     | -16.202, 3.002  |                    |
| RBS (mg/dL)                                                      | Baseline | 92.60 $\pm$ 22.34   | 110.93 $\pm$ 96.81  | 0.316                     | -17.980, 54.640 | 79-140             |
|                                                                  | EOT      | 93.46 $\pm$ 15.60   | 108.93 $\pm$ 84.45  | 0.328                     | -15.915, 46.855 |                    |

**Table S4** Assessment of hematological and biochemical parameters of pediatric subjects from both Test-PS and Placebo-PS arm suffered with antibiotic-associated diarrhea (AAD) and undergone treatment with *Alkalihalobacillus clausii* 088AE at baseline and end of treatment (EOT). Values are expressed as mean  $\pm$  SD and significance between mean difference (Test-PS to Placebo-PS) is tested at  $p < 0.05$ .

| Parameters                                                                   | Visit    | Test-PS            | Placebo-PS         | P value<br>( $p < 0.05$ ) | 95% CI          | Normal range |
|------------------------------------------------------------------------------|----------|--------------------|--------------------|---------------------------|-----------------|--------------|
| <i>Hemoglobin (g/dL)</i>                                                     | Baseline | 12.51 $\pm$ 0.70   | 12.30 $\pm$ 0.81   | 0.287                     | -0.601, 0.181   | 10.9-14.9    |
|                                                                              | EOT      | 12.50 $\pm$ 0.72   | 12.31 $\pm$ 0.80   | 0.337                     | -0.583, 0.203   |              |
| <i>RBC count (million/mm<sup>3</sup>)</i>                                    | Baseline | 4.42 $\pm$ 0.28    | 4.34 $\pm$ 0.26    | 0.256                     | -0.219, 0.059   | 3.80-5.20    |
|                                                                              | EOT      | 4.39 $\pm$ 0.22    | 4.35 $\pm$ 0.23    | 0.494                     | -0.156, 0.076   |              |
| <i>Total leukocyte count (<math>\times 10^3</math> cells/mm<sup>3</sup>)</i> | Baseline | 11.53 $\pm$ 0.80   | 11.55 $\pm$ 0.90   | 0.927                     | -0.420, 0.460   | 4.50-14.50   |
|                                                                              | EOT      | 9.93 $\pm$ 0.81    | 10.06 $\pm$ 1.18   | 0.620                     | -0.393, 0.653   |              |
| <i>Neutrophils (%)</i>                                                       | Baseline | 65.22 $\pm$ 3.53   | 65.37 $\pm$ 4.28   | 0.882                     | -1.877, 2.177   | 38-68        |
|                                                                              | EOT      | 68.48 $\pm$ 3.16   | 67.28 $\pm$ 3.48   | 0.167                     | -2.917, 0.517   |              |
| <i>Lymphocytes (%)</i>                                                       | Baseline | 43.48 $\pm$ 7.28   | 44.14 $\pm$ 4.52   | 0.674                     | -2.471, 3.791   | 25-54        |
|                                                                              | EOT      | 43.33 $\pm$ 3.45   | 41.74 $\pm$ 3.18   | 0.068                     | -3.304, 0.124   |              |
| <i>Eosinophils (%)</i>                                                       | Baseline | 2.94 $\pm$ 1.09    | 2.89 $\pm$ 1.08    | 0.859                     | -0.610, 0.510   | 0-3          |
|                                                                              | EOT      | 2.95 $\pm$ 0.79    | 3.05 $\pm$ 0.75    | 0.617                     | -0.298, 0.498   |              |
| <i>Monocytes (%)</i>                                                         | Baseline | 4.39 $\pm$ 1.04    | 4.32 $\pm$ 0.92    | 0.783                     | -0.577, 0.437   | 4-10         |
|                                                                              | EOT      | 4.61 $\pm$ 0.80    | 4.70 $\pm$ 0.76    | 0.656                     | -0.313, 0.493   |              |
| <i>Basophils (%)</i>                                                         | Baseline | 0.31 $\pm$ 0.57    | 0.31 $\pm$ 0.25    | 1.000                     | -0.227, 0.227   | 0-1          |
|                                                                              | EOT      | 0.27 $\pm$ 0.16    | 0.31 $\pm$ 0.21    | 0.410                     | -0.056, 0.136   |              |
| <i>Hematocrit (PCV, %)</i>                                                   | Baseline | 35.97 $\pm$ 2.15   | 36.50 $\pm$ 2.39   | 0.370                     | -0.644, 1.704   | 35-44        |
|                                                                              | EOT      | 35.84 $\pm$ 1.87   | 35.99 $\pm$ 2.08   | 0.770                     | -0.872, 1.172   |              |
| <i>Platelet Count (lakh/mm<sup>3</sup>)</i>                                  | Baseline | 291.63 $\pm$ 36.62 | 282.60 $\pm$ 34.81 | 0.331                     | -27.494, 9.434  | 0.15-0.45    |
|                                                                              | EOT      | 283.76 $\pm$ 29.74 | 283.53 $\pm$ 25.79 | 0.974                     | -14.616, 14.156 |              |
| <i>ESR (mm/hr)</i>                                                           | Baseline | 7.93 $\pm$ 4.84    | 8.10 $\pm$ 4.11    | 0.883                     | -2.150, 2.490   | 0-10         |
|                                                                              | EOT      | 8.16 $\pm$ 4.01    | 8.43 $\pm$ 3.67    | 0.786                     | -1.716, 2.256   |              |
| <i>SGOT (AST) (U/L)</i>                                                      | Baseline | 39.25 $\pm$ 3.51   | 39.11 $\pm$ 2.85   | 0.865                     | -1.792, 1.512   | 5-40         |
|                                                                              | EOT      | 30.09 $\pm$ 2.86   | 31.31 $\pm$ 2.50   | 0.083                     | -0.168, 2.608   |              |
| <i>SGPT (ALT) (U/L)</i>                                                      | Baseline | 40.21 $\pm$ 3.11   | 40.09 $\pm$ 2.86   | 0.876                     | -1.664, 1.424   | 7-56         |
|                                                                              | EOT      | 35.20 $\pm$ 2.71   | 34.01 $\pm$ 2.82   | 0.101                     | -2.619, 0.239   |              |
| <i>Creatinine (mg/dL)</i>                                                    | Baseline | 0.64 $\pm$ 0.06    | 0.66 $\pm$ 0.07    | 0.239                     | -0.013, 0.053   | 0.5-1.0      |
|                                                                              | EOT      | 0.65 $\pm$ 0.06    | 0.67 $\pm$ 0.06    | 0.201                     | -0.011, 0.051   |              |
| <i>BUN (mg/dL)</i>                                                           | Baseline | 14.30 $\pm$ 5.88   | 16.32 $\pm$ 3.97   | 0.124                     | -0.572, 4.612   | 5-18         |
|                                                                              | EOT      | 15.45 $\pm$ 5.35   | 17.32 $\pm$ 4.03   | 0.131                     | -0.577, 4.317   |              |
| <i>Albumin (g/dL)</i>                                                        | Baseline | 3.93 $\pm$ 0.35    | 3.89 $\pm$ 0.46    | 0.706                     | -0.251, 0.171   | 3.4-5.4      |
|                                                                              | EOT      | 3.95 $\pm$ 0.40    | 3.95 $\pm$ 0.33    | 1.000                     | -0.189, 0.189   |              |
| <i>Serum sodium (mEq/L)</i>                                                  | Baseline | 136.40 $\pm$ 3.35  | 136.76 $\pm$ 3.83  | 0.699                     | -1.499, 2.219   | 135-145      |
|                                                                              | EOT      | 137.93 $\pm$ 2.55  | 139.60 $\pm$ 4.85  | 0.100                     | -0.332, 3.672   |              |
| <i>Serum potassium (mmol/L)</i>                                              | Baseline | 4.10 $\pm$ 0.67    | 4.34 $\pm$ 0.56    | 0.137                     | -0.079, 0.559   | 3.4-4.7      |
|                                                                              | EOT      | 4.13 $\pm$ 0.56    | 4.33 $\pm$ 0.42    | 0.123                     | -0.056, 0.455   |              |
| <i>Total cholesterol (mg/dL)</i>                                             | Baseline | 156.50 $\pm$ 19.22 | 150.23 $\pm$ 18.83 | 0.206                     | -16.103, 3.563  | 125-200      |
|                                                                              | EOT      | 156.50 $\pm$ 18.21 | 150.23 $\pm$ 17.34 | 0.177                     | -15.459, 2.919  |              |
| <i>RBS (mg/dL)</i>                                                           | Baseline | 98.30 $\pm$ 14.94  | 95.73 $\pm$ 14.44  | 0.501                     | -10.163, 5.023  | 79-140       |
|                                                                              | EOT      | 94.40 $\pm$ 11.15  | 95.03 $\pm$ 8.18   | 0.803                     | -4.423, 5.683   |              |
